# Supplementary material for: Multi-Organ Nutrigenomic Effects of Dietary Grapes in a Mouse Model
Source: MDPI journal article supplement (doi:10.3390/antiox12101821), 2023-10-01
Supplement: s1 [file s1]

# Multi-organ Nutrigenomic Effects of Dietary Grapes in a Mouse Model

Asim Dave <sup>1,2</sup>, Eun-Jung Park <sup>1,3</sup> and John M. Pezzuto <sup>4,5\*</sup>

<sup>1</sup> Division of Pharmaceutical Sciences, Arnold & Marie Schwartz College of Pharmacy and Health Sciences, Long Island University, Brooklyn, NY 11201, USA; davea3@mskcc.org; eunjung.park@liu.edu

<sup>2</sup> Current Address: Immunology Program, Memorial Sloan Kettering Cancer Center, New York, NY 10065, USA

<sup>3</sup> Current Address: Department of Pharmaceutical and Administrative Science, College of Pharmacy and Health Sciences, Western New England University, Springfield, MA 01119, USA

<sup>4</sup> College of Pharmacy and Health Sciences, Western New England University, Springfield, MA 01119, USA; john.pezzuto@wne.edu

<sup>5</sup> Department of Medicine, UMass Chan Medical School—Baystate, Springfield, MA 01199, USA

\* Correspondence: john.pezzuto@wne.edu

**Supplement 1.** Data for the DEG list in liver, colon, kidney and ovary.

**Table S1.** Genes present in the DEG list for different tissues.

**A.** DEG list for liver.

| Sr. No. | Gene Name      | STD5GP vs STD | STD5GP vs STD<br>Log2(Fold-change) | q value       |
|---------|----------------|---------------|------------------------------------|---------------|
| 1       | <i>Apcs</i>    | Up            | 1.06                               | $q < 10^{-4}$ |
| 2       | <i>C8a</i>     | Up            | 1.04                               | $q < 10^{-4}$ |
| 3       | <i>Cyp3a13</i> | Up            | 1.2                                | $q < 10^{-4}$ |
| 4       | <i>Fgl1</i>    | Up            | 1.03                               | $q < 10^{-4}$ |
| 5       | <i>Gm4794</i>  | Up            | 1.86                               | $q < 10^{-4}$ |
| 6       | <i>Lcn2</i>    | Up            | 1.56                               | $q < 10^{-4}$ |
| 7       | <i>Lrg1</i>    | Up            | 1.05                               | $q < 10^{-4}$ |
| 8       | <i>Mup10</i>   | Up            | 1.02                               | $q < 10^{-4}$ |
| 9       | <i>Sult3a1</i> | Up            | 1.78                               | $q < 10^{-4}$ |
| 10      | <i>C8b</i>     | Up            | 1.11                               | 0.0001        |
| 11      | <i>Orm2</i>    | Up            | 1.93                               | 0.0004        |
| 12      | <i>S100a9</i>  | Up            | 2.43                               | 0.0006        |
| 13      | <i>Ngp</i>     | Up            | 3.16                               | 0.0027        |
| 14      | <i>Cyp2a12</i> | Down          | -1.03                              | $q < 10^{-4}$ |
| 15      | <i>Cyp2a4</i>  | Down          | -1.06                              | $q < 10^{-4}$ |
| 16      | <i>Gbp2</i>    | Down          | -1.57                              | $q < 10^{-4}$ |
| 17      | <i>Gbp6</i>    | Down          | -1.12                              | $q < 10^{-4}$ |
| 18      | <i>Gbp7</i>    | Down          | -1.07                              | $q < 10^{-4}$ |
| 19      | <i>Igtp</i>    | Down          | -1.17                              | $q < 10^{-4}$ |

|    |                  |      |       |               |
|----|------------------|------|-------|---------------|
| 20 | <i>Scd1</i>      | Down | -1.36 | $q < 10^{-4}$ |
| 21 | <i>BC023105</i>  | Down | -1.13 | 0.0001        |
| 22 | <i>Pdk4</i>      | Down | -1.13 | 0.0001        |
| 23 | <i>Rps2-ps10</i> | Down | -1.01 | 0.0001        |
| 24 | <i>Tgtp1</i>     | Down | -1.89 | 0.0001        |
| 25 | <i>mt-Co3</i>    | Down | -3.15 | 0.0003        |
| 26 | <i>Cxcl9</i>     | Down | -1.24 | 0.0008        |
| 27 | <i>Sult2a6</i>   | Down | -1.28 | 0.0014        |

**B.** DEG list for colon.

| Sr. No. | Gene Name            | STD5GP vs STD | STD5GP vs STD<br>Log2(Fold-change) | q value       |
|---------|----------------------|---------------|------------------------------------|---------------|
| 1       | <i>2010109I03Rik</i> | Up            | 1.62                               | $q < 10^{-4}$ |
| 2       | <i>2210010C04Rik</i> | Up            | 8.05                               | $q < 10^{-4}$ |
| 3       | <i>Amy2b</i>         | Up            | 9.54                               | $q < 10^{-4}$ |
| 4       | <i>Cel</i>           | Up            | 8.18                               | $q < 10^{-4}$ |
| 5       | <i>Cela1</i>         | Up            | 1.19                               | $q < 10^{-4}$ |
| 6       | <i>Cela2a</i>        | Up            | 9.45                               | $q < 10^{-4}$ |
| 7       | <i>Cela3b</i>        | Up            | 8.47                               | $q < 10^{-4}$ |
| 8       | <i>Clps</i>          | Up            | 6.03                               | $q < 10^{-4}$ |
| 9       | <i>Cpa1</i>          | Up            | 8.56                               | $q < 10^{-4}$ |
| 10      | <i>Cpa2</i>          | Up            | 6.02                               | $q < 10^{-4}$ |
| 11      | <i>Cpb1</i>          | Up            | 8.27                               | $q < 10^{-4}$ |
| 12      | <i>Ctrb1</i>         | Up            | 8.17                               | $q < 10^{-4}$ |
| 13      | <i>Ctrc</i>          | Up            | 8.48                               | $q < 10^{-4}$ |
| 14      | <i>Ctrl</i>          | Up            | 7.32                               | $q < 10^{-4}$ |
| 15      | <i>Gp2</i>           | Up            | 3.09                               | $q < 10^{-4}$ |
| 16      | <i>Gstp1</i>         | Up            | 1.3                                | $q < 10^{-4}$ |
| 17      | <i>H2-Eb1</i>        | Up            | 1.19                               | $q < 10^{-4}$ |
| 18      | <i>Ighv7-3</i>       | Up            | 2.83                               | $q < 10^{-4}$ |
| 19      | <i>Iglc2</i>         | Up            | 1.49                               | $q < 10^{-4}$ |
| 20      | <i>Iglv2</i>         | Up            | 1.7                                | $q < 10^{-4}$ |
| 21      | <i>Pnlip</i>         | Up            | 8.42                               | $q < 10^{-4}$ |
| 22      | <i>Pnliprp1</i>      | Up            | 7.73                               | $q < 10^{-4}$ |
| 23      | <i>Pnliprp2</i>      | Up            | 3.45                               | $q < 10^{-4}$ |
| 24      | <i>Prss2</i>         | Up            | 8.78                               | $q < 10^{-4}$ |
| 25      | <i>Reg1</i>          | Up            | 9.07                               | $q < 10^{-4}$ |
| 26      | <i>Rnase1</i>        | Up            | 8.03                               | $q < 10^{-4}$ |
| 27      | <i>Rpl35a</i>        | Up            | 1.18                               | $q < 10^{-4}$ |
| 28      | <i>Rpl38</i>         | Up            | 1.13                               | $q < 10^{-4}$ |
| 29      | <i>Rpl39</i>         | Up            | 1.05                               | $q < 10^{-4}$ |
| 30      | <i>Rps27rt</i>       | Up            | 1.07                               | $q < 10^{-4}$ |
| 31      | <i>Rpsa-ps10</i>     | Up            | 1.76                               | $q < 10^{-4}$ |
| 32      | <i>Socs3</i>         | Up            | 2.6                                | $q < 10^{-4}$ |

|    |                    |      |       |               |
|----|--------------------|------|-------|---------------|
| 33 | <i>Tpm3-rs7</i>    | Up   | 1.76  | $q < 10^{-4}$ |
| 34 | <i>Try4</i>        | Up   | 8.91  | $q < 10^{-4}$ |
| 35 | <i>Try5</i>        | Up   | 8.33  | $q < 10^{-4}$ |
| 36 | <i>Igkv1-110</i>   | Up   | 2.24  | 0.0001        |
| 37 | <i>Igkv2-109</i>   | Up   | 3.15  | 0.0001        |
| 38 | <i>Tff2</i>        | Up   | 7.17  | 0.0002        |
| 39 | <i>Reg2</i>        | Up   | 9.39  | 0.0004        |
| 40 | <i>Rps27</i>       | Up   | 1.11  | 0.0004        |
| 41 | <i>RP23-8J15.3</i> | Up   | 4.67  | 0.0004        |
| 42 | <i>Pla2g1b</i>     | Up   | 6.99  | 0.0007        |
| 43 | <i>Cuzd1</i>       | Up   | 5.12  | 0.0018        |
| 44 | <i>Gm3608</i>      | Up   | 2     | 0.0019        |
| 45 | <i>Igkv13-84</i>   | Up   | 2.97  | 0.002         |
| 46 | <i>Ly6c2</i>       | Up   | 1.53  | 0.0025        |
| 47 | <i>Igkv4-72</i>    | Up   | 3.25  | 0.0043        |
| 48 | <i>Ang4</i>        | Down | -1.9  | $q < 10^{-4}$ |
| 49 | <i>Ceacam2</i>     | Down | -5.23 | $q < 10^{-4}$ |
| 50 | <i>Clca3</i>       | Down | -1.03 | $q < 10^{-4}$ |
| 51 | <i>Ddx60</i>       | Down | -2.06 | $q < 10^{-4}$ |
| 52 | <i>Gm10275</i>     | Down | -7.3  | $q < 10^{-4}$ |
| 53 | <i>Gm26917</i>     | Down | -5.58 | $q < 10^{-4}$ |
| 54 | <i>Hsp90aa1</i>    | Down | -4.61 | $q < 10^{-4}$ |
| 55 | <i>Ifi44</i>       | Down | -3.46 | $q < 10^{-4}$ |
| 56 | <i>Ifit1</i>       | Down | -2.39 | $q < 10^{-4}$ |
| 57 | <i>Ifit2</i>       | Down | -1.93 | $q < 10^{-4}$ |
| 58 | <i>Ighv1-53</i>    | Down | -1.92 | $q < 10^{-4}$ |
| 59 | <i>Irf7</i>        | Down | -1.03 | $q < 10^{-4}$ |
| 60 | <i>Itln1</i>       | Down | -1.58 | $q < 10^{-4}$ |
| 61 | <i>Lars2</i>       | Down | -2.8  | $q < 10^{-4}$ |
| 62 | <i>Lgals9</i>      | Down | -1.1  | $q < 10^{-4}$ |
| 63 | <i>Mptx1</i>       | Down | -3.52 | $q < 10^{-4}$ |
| 64 | <i>Mptx2</i>       | Down | -3.66 | $q < 10^{-4}$ |
| 65 | <i>Oas2</i>        | Down | -3.46 | $q < 10^{-4}$ |
| 66 | <i>Oas3</i>        | Down | -2.42 | $q < 10^{-4}$ |
| 67 | <i>Oasl2</i>       | Down | -1.59 | $q < 10^{-4}$ |
| 68 | <i>Rnf213</i>      | Down | -1.07 | $q < 10^{-4}$ |
| 69 | <i>RP23-8J15.2</i> | Down | -6.12 | $q < 10^{-4}$ |
| 70 | <i>Rpl12</i>       | Down | -4.08 | $q < 10^{-4}$ |
| 71 | <i>Rrp1</i>        | Down | -3.67 | $q < 10^{-4}$ |
| 72 | <i>Rrp7a</i>       | Down | -2.71 | $q < 10^{-4}$ |
| 73 | <i>Rsad2</i>       | Down | -2.43 | $q < 10^{-4}$ |
| 74 | <i>Scd1</i>        | Down | -1.31 | $q < 10^{-4}$ |
| 75 | <i>Slfn4</i>       | Down | -3.29 | $q < 10^{-4}$ |
| 76 | <i>Yam1</i>        | Down | -4.99 | $q < 10^{-4}$ |
| 77 | <i>Car3</i>        | Down | -1.23 | 0.0001        |

|    |                |      |       |        |
|----|----------------|------|-------|--------|
| 78 | <i>Slfn9</i>   | Down | -1.35 | 0.0004 |
| 79 | <i>Stat2</i>   | Down | -1.07 | 0.0005 |
| 80 | <i>Cd177</i>   | Down | -1.44 | 0.0006 |
| 81 | <i>Lpl</i>     | Down | -1.4  | 0.0013 |
| 82 | <i>Slfn2</i>   | Down | -1.13 | 0.0022 |
| 83 | <i>Mx1</i>     | Down | -2.39 | 0.0026 |
| 84 | <i>Gm21092</i> | Down | -1.06 | 0.0047 |

C. DEG list for kidney.

| Sr. No. | Gene Name       | STD5GP vs STD | STD5GP vs STD<br>Log2(Fold-change) | <i>q</i> value |
|---------|-----------------|---------------|------------------------------------|----------------|
| 1       | <i>Igha</i>     | Up            | 1.77                               | $q < 10^{-4}$  |
| 2       | <i>Ighg1</i>    | Up            | 6.24                               | $q < 10^{-4}$  |
| 3       | <i>Ighg2b</i>   | Up            | 4.77                               | $q < 10^{-4}$  |
| 4       | <i>Ighg2c</i>   | Up            | 5.16                               | $q < 10^{-4}$  |
| 5       | <i>Ighg3</i>    | Up            | 5.34                               | $q < 10^{-4}$  |
| 6       | <i>Ighm</i>     | Up            | 2.76                               | $q < 10^{-4}$  |
| 7       | <i>Igj</i>      | Up            | 2.87                               | $q < 10^{-4}$  |
| 8       | <i>Igkc</i>     | Up            | 3.27                               | $q < 10^{-4}$  |
| 9       | <i>Alb</i>      | Down          | -1.13                              | $q < 10^{-4}$  |
| 10      | <i>Cyp2d12</i>  | Down          | -1.67                              | $q < 10^{-4}$  |
| 11      | <i>Gbp6</i>     | Down          | -2.88                              | $q < 10^{-4}$  |
| 12      | <i>Gbp7</i>     | Down          | -1.59                              | $q < 10^{-4}$  |
| 13      | <i>Igtp</i>     | Down          | -2.19                              | $q < 10^{-4}$  |
| 14      | <i>Iigp1</i>    | Down          | -3.19                              | $q < 10^{-4}$  |
| 15      | <i>Irgm1</i>    | Down          | -1.1                               | $q < 10^{-4}$  |
| 16      | <i>Irgm2</i>    | Down          | -1.69                              | $q < 10^{-4}$  |
| 17      | <i>Snhg11</i>   | Down          | -1.28                              | $q < 10^{-4}$  |
| 18      | <i>Tgtp1</i>    | Down          | -2.64                              | $q < 10^{-4}$  |
| 19      | <i>Tgtp2</i>    | Down          | -2.12                              | $q < 10^{-4}$  |
| 20      | <i>BC023105</i> | Down          | -2.99                              | 0.0032         |
| 21      | <i>Gbp2</i>     | Down          | -1.66                              | 0.0036         |

D. DEG list for ovary.

| Sr. No. | Gene Name            | STD5GP vs STD | STD5GP vs STD<br>Log2(Fold-change) | <i>q</i> value |
|---------|----------------------|---------------|------------------------------------|----------------|
| 1       | <i>Adamts1</i>       | Up            | 1.67                               | $q < 10^{-4}$  |
| 2       | <i>Ereg</i>          | Up            | 5.1                                | $q < 10^{-4}$  |
| 3       | <i>Vcan</i>          | Up            | 1.31                               | $q < 10^{-4}$  |
| 4       | <i>Adamts4</i>       | Up            | 2.75                               | 0.0001         |
| 5       | <i>4833423E24Rik</i> | Down          | -3.24                              | $q < 10^{-4}$  |
| 6       | <i>Calb1</i>         | Down          | -3.05                              | $q < 10^{-4}$  |
| 7       | <i>Car2</i>          | Down          | -2.58                              | $q < 10^{-4}$  |
| 8       | <i>Cbr2</i>          | Down          | -3.19                              | $q < 10^{-4}$  |

|    |                      |      |       |               |
|----|----------------------|------|-------|---------------|
| 9  | <i>Cd24a</i>         | Down | -2.16 | $q < 10^{-4}$ |
| 10 | <i>Ces2a</i>         | Down | -2.89 | $q < 10^{-4}$ |
| 11 | <i>Ctla2a</i>        | Down | -2.82 | $q < 10^{-4}$ |
| 12 | <i>Fam213a</i>       | Down | -1.32 | $q < 10^{-4}$ |
| 13 | <i>Fxyd4</i>         | Down | -3.28 | $q < 10^{-4}$ |
| 14 | <i>Kap</i>           | Down | -6.18 | $q < 10^{-4}$ |
| 15 | <i>Krt18</i>         | Down | -1.76 | $q < 10^{-4}$ |
| 16 | <i>Krt19</i>         | Down | -1.73 | $q < 10^{-4}$ |
| 17 | <i>Lcn2</i>          | Down | -2.15 | $q < 10^{-4}$ |
| 18 | <i>Ltf</i>           | Down | -3    | $q < 10^{-4}$ |
| 19 | <i>Ovgp1</i>         | Down | -2.03 | $q < 10^{-4}$ |
| 20 | <i>Pdxk</i>          | Down | -1.2  | $q < 10^{-4}$ |
| 21 | <i>Plet1</i>         | Down | -2.55 | $q < 10^{-4}$ |
| 22 | <i>Prap1</i>         | Down | -9.85 | $q < 10^{-4}$ |
| 23 | <i>Rnf128</i>        | Down | -1.33 | $q < 10^{-4}$ |
| 24 | <i>Rpl26</i>         | Down | -1.12 | $q < 10^{-4}$ |
| 25 | <i>Sectm1b</i>       | Down | -2.2  | $q < 10^{-4}$ |
| 26 | <i>Slc25a48</i>      | Down | -3.62 | $q < 10^{-4}$ |
| 27 | <i>Snhg11</i>        | Down | -2.26 | $q < 10^{-4}$ |
| 28 | <i>Wfdc2</i>         | Down | -4.15 | $q < 10^{-4}$ |
| 29 | <i>BC048546</i>      | Down | -1.83 | 0.0001        |
| 30 | <i>Cbs</i>           | Down | -1.74 | 0.0001        |
| 31 | <i>Chdh</i>          | Down | -2.4  | 0.0001        |
| 32 | <i>Dpt</i>           | Down | -2.24 | 0.0001        |
| 33 | <i>Gsto1</i>         | Down | -1.07 | 0.0001        |
| 34 | <i>Igha</i>          | Down | -2.24 | 0.0001        |
| 35 | <i>Sprr2f</i>        | Down | -5.35 | 0.0001        |
| 36 | <i>Hdc</i>           | Down | -1.19 | 0.0002        |
| 37 | <i>S100g</i>         | Down | -3.43 | 0.0003        |
| 38 | <i>Igj</i>           | Down | -1.88 | 0.0003        |
| 39 | <i>Clca3</i>         | Down | -8.84 | 0.0004        |
| 40 | <i>Ehf</i>           | Down | -1.69 | 0.0009        |
| 41 | <i>Galm</i>          | Down | -1.64 | 0.0009        |
| 42 | <i>Tppp3</i>         | Down | -1.47 | 0.0014        |
| 43 | <i>Krt8</i>          | Down | -1.07 | 0.0014        |
| 44 | <i>Krt7</i>          | Down | -1.99 | 0.0017        |
| 45 | <i>Igkc</i>          | Down | -1.18 | 0.0017        |
| 46 | <i>1500015O10Rik</i> | Down | -1.45 | 0.0025        |
| 47 | <i>Cxcl17</i>        | Down | -5.27 | 0.0027        |
| 48 | <i>Cdh1</i>          | Down | -1.74 | 0.0038        |
| 49 | <i>Slc14a1</i>       | Down | -1.61 | 0.0038        |

---
